# Supplementary material for: Lithium acetylides as alkynylating reagents for the enantioselective alkynylation of ketones catalyzed by lithium binaphtholate
Source: Royal Society of Chemistry journal article supplement (doi:10.1039/c1cc10734h), 2011-01-01
Supplement: c1cc10734h.pdf [file c1cc10734h.pdf]

## Supplementary Information

### Lithium acetylides as alkynylating reagents for the enantioselective alkynylation of ketones catalyzed by lithium binaphtholate

Kana Tanaka<sup>a</sup>, Kenji Kukita<sup>a</sup>, Tomonori Ichibakase<sup>a</sup>, Shunsuke Kotani<sup>b</sup> and Makoto Nakajima<sup>\*a</sup>

<sup>a</sup>Graduate School of Pharmaceutical Sciences, Kumamoto University, Kumamoto 862-0973, Japan  
Fax: +81-96-362-7692; Tel: +81-96-371-4680; E-mail: nakajima@gpo.kumamoto-u.ac.jp

<sup>b</sup>Priority Organization for Innovation and Excellence, Kumamoto University.

#### General Methods

<sup>1</sup>H and <sup>13</sup>C NMR spectra were measured in CDCl<sub>3</sub> with JEOL JNM-ECX400 spectrometer. Tetramethylsilane (TMS) (δ = 0 ppm) and CDCl<sub>3</sub> (δ = 77.0 ppm) served as internal standards for <sup>1</sup>H and <sup>13</sup>C NMR, respectively. Infrared spectra were recorded on JEOL JIR 6500-W. Mass spectra were measured with JEOL JMS-DX303HF mass spectrometer. Optical rotations were recorded on JASCO P-1010 polarimeter. High-pressure liquid chromatography (HPLC) was performed on JASCO P-980 and UV-1575. Dry THF was purchased from Kanto Chemical. (*S*)-3,3'-diphenylbinaphthol was prepared by Suzuki coupling according to the literature method.<sup>1</sup> All other chemicals were purified based on standard procedures.

#### Representative procedure for the enantioselective alkynylation

Under Ar atmosphere, *n*-BuLi (1.65 M in hexane, 0.57 mL, 0.941 mmol) was added to the solution of (*R*)-3,3'-diphenyl-1,1'-binaphthalene-2,2'-diol (**1**) (21 mg, 0.047 mmol) and phenylacetylene (**3a**) (0.10 mL, 0.94 mmol) in THF (3 mL) at -78 °C. To the mixture, acetophenone (**2b**) (56 mg, 0.47 mmol) in THF (0.5 mL) was added dropwise at the same temperature and the solution was stirred for 12 h. The reaction was quenched with NH<sub>4</sub>Cl sat. aq. and the mixture was extracted with AcOEt. The organic layer was washed with NaHCO<sub>3</sub> and brine. After drying over Na<sub>2</sub>SO<sub>4</sub>, the solvent was removed and the residue was purified by silica gel column chromatography (hexane/CH<sub>2</sub>Cl<sub>2</sub>=1:1), affording **4ba** (100 mg, 96%) as an oil. The ee was determined by chiral HPLC (Daicel OD-H) to be 93% ee.

#### 2,4-Diphenyl-but-3-yn-2-ol (**4ba**)<sup>2</sup>

[α]<sub>D</sub><sup>17</sup> -7.0 (*c* 1.16, CHCl<sub>3</sub>, 93% ee) [lit.: [α]<sub>D</sub><sup>16</sup> -6.6 (*c* 1.00, CHCl<sub>3</sub>), 81% ee, *S*].

HPLC (Daicel chiralcel OD-H, hexane/IPA = 19/1, 1.0 mL/min):

*t*<sub>R</sub>(min) 8.8 (minor), 11.5 (major).

<sup>1</sup>H NMR (CDCl<sub>3</sub>, 400 MHz): δ 1.87 (s, 3H, CH<sub>3</sub>), 2.46 (s, 1H, OH), 7.30-7.50 (m, 8H, Ar-*H*), 7.73-7.75 (m, 2H, Ar-*H*).

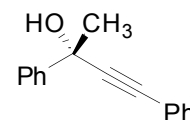

#### 2-Phenyl-3-octyn-2-ol (**4bb**)<sup>3</sup>

[α]<sub>D</sub><sup>24</sup> -0.7 (*c* 0.67, CHCl<sub>3</sub>, 87% ee)

HPLC (Daicel chiralcel OD-H, hexane/IPA = 200/1, 1.0 mL/min):

*t*<sub>R</sub>(min) 19.6 (minor), 21.5 (major).

<sup>1</sup>H NMR (CDCl<sub>3</sub>, 400 MHz): δ 0.93 (t, 3H, *J* = 7.3 Hz, CH<sub>3</sub>), 1.39-1.48 (m, 2H), 1.50-1.58 (m, 2H), 1.75 (s,

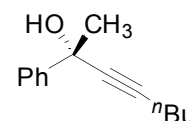

3H,  $CH_3$ ), 2.28 (t, 2H,  $J=7.3$  Hz), 2.31 (brs, 1H, OH), 7.26-7.30 (m, 1H), 7.34-7.37 (m, 2H), 7.65-7.67 (m, 2H).

**1-Benzyloxy-4-phenyl-2-pentyn-4-ol (4bc)<sup>4</sup>**

$[\alpha]_D^{24}$  -4.0 ( $c$  1.15,  $CHCl_3$ , 86% ee)

HPLC (Daicel chiralcel OD-H, hexane/IPA = 19/1, 1.0 mL/min):

$t_R$ (min) 14.8 (minor), 17.2 (major).

$^1H$  NMR ( $CDCl_3$ , 400 MHz):  $\delta$  1.76 (s, 3H), 2.93 (s, 1H, OH), 4.22 (s, 2H), 4.58 (s, 2H), 7.24-7.36 (m, 8H), 7.63 (d, 2H,  $J=7.3$  Hz).

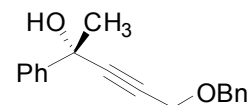

**5,5-Dimethyl-2-phenyl-3-hexyn-2-ol (4bd)<sup>5</sup>**

$[\alpha]_D^{23}$  +3.4 ( $c$  0.41,  $CHCl_3$ , 55% ee)

HPLC (Daicel chiralcel OD-H, hexane/IPA = 39/1, 1.0 mL/min):

$t_R$ (min) 9.5 (major), 10.3 (minor).

$^1H$  NMR ( $CDCl_3$ , 400 MHz):  $\delta$  1.27 (s, 9H,  $(CH_3)_3$ ), 1.73 (s, 3H,  $CH_3$ ), 2.26 (s, 1H, OH), 7.26-7.30 (m, 1H), 7.34-7.36 (m, 2H), 7.65-7.67 (m, 2H).

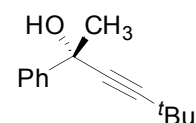

**1,3-Diphenyl-pent-1-yn-3-ol (4ca)<sup>6</sup>**

$[\alpha]_D^{15}$  -9.0 ( $c$  1.00,  $CHCl_3$ , 73% ee)

HPLC (Daicel chiralcel OD-H, hexane/IPA = 29/1, 1.0 mL/min):

$t_R$ (min) 10.3 (minor), 11.5 (major).

$^1H$  NMR ( $CDCl_3$ , 400 MHz):  $\delta$  1.03 (t, 3H,  $J=7.3$  Hz,  $-CH_2CH_3$ ), 1.95-2.11 (m, 2H,  $-CH_2CH_3$ ), 2.45 (s, 1H, OH), 7.30-7.40 (m, 6H Ar-H), 7.48-7.51 (m, 2H, Ar-H), 7.68-7.77 (m, 2H, Ar-H).

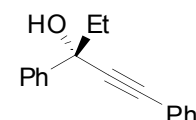

**4-Methyl-1,3-diphenyl-pent-1-yn-3-ol (4da)<sup>7</sup>**

$[\alpha]_D^{20}$  -1.4 ( $c$  1.30,  $CHCl_3$ , 7% ee)

HPLC (Daicel chiralcel AD-H, hexane/IPA = 19/1, 1.0 mL/min):

$t_R$ (min) 11.1 (major), 17.1 (minor).

$^1H$  NMR ( $CDCl_3$ , 400 MHz):  $\delta$  0.89 (d, 3H,  $J=6.8$  Hz), 1.14 (d, 3H,  $J=6.8$  Hz), 2.14-2.23 (m, 1H), 2.41 (s, 1H, OH), 7.28-7.39 (m, 6H, Ar-H), 7.49-7.51 (m, 2H, Ar-H), 7.67-7.69 (m, 2H, Ar-H).

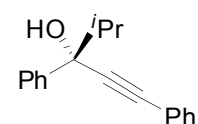

**2-Cyclohexyl-4-phenyl-but-3-yn-2-ol (4ea)<sup>8</sup>**

$[\alpha]_D^{26}$  +3.8 ( $c$  1.40,  $CHCl_3$ , 57% ee)

HPLC (Daicel chiralcel OD-H, hexane/IPA = 19/1, 1.0 mL/min):

$t_R$ (min) 6.1 (minor), 8.7 (major).

$^1H$  NMR ( $CDCl_3$ , 400 MHz):  $\delta$  1.14-1.30 (m, 5H), 1.51-1.52 (m, 1H), 1.54 (s, 3H,  $CH_3$ ), 1.68-1.71 (m, 1H), 1.82-1.84 (m, 2H), 1.91-1.95 (m, 1H), 2.02-2.05 (m, 1H), 7.30-7.31 (m, 3H, Ar-H), 7.41-7.44 (m, 2H, Ar-H).

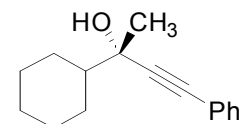

### 3-Methyl-1,5-diphenyl-pent-1-yn-3-ol (4fa)<sup>9</sup>

$[\alpha]_D^{24} +6.3$  (*c* 1.48, CHCl<sub>3</sub>, 39% ee)

HPLC (Daicel chiralcel OD-H, hexane/IPA = 19/1, 1.0 mL/min):

*t<sub>R</sub>*(min) 10.5 (minor), 14.8 (major).

<sup>1</sup>H NMR (CDCl<sub>3</sub>, 400 MHz) :  $\delta$  1.63 (s, 3H, CH<sub>3</sub>), 2.01-2.10 (m, 2H), 2.91-2.95 (m, 2H), 7.18-7.22 (m, 8H, Ar-H), 7.43-7.46 (m, 2H, Ar-H).

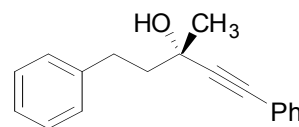

### 4-Phenyl-2-p-tolyl-but-3-yn-2-ol (4ga)<sup>10</sup>

$[\alpha]_D^{27} -4.8$  (*c* 1.16, CHCl<sub>3</sub>, 88% ee)

HPLC (Daicel chiralcel OD-H, hexane/IPA = 19/1, 1.0 mL/min):

*t<sub>R</sub>*(min) 8.5 (minor), 11.6 (major).

<sup>1</sup>H NMR (CDCl<sub>3</sub>, 400 MHz) :  $\delta$  1.86 (s, 3H, CH<sub>3</sub>), 2.37 (s, 3H, Ar-CH<sub>3</sub>), 2.41 (s, 1H, OH), 7.19 (d, 2H, *J* = 8.2 Hz), 7.32-7.33 (m, 3H, Ar-H), 7.47-7.49 (m, 2H, Ar-H), 7.62 (d, 2H, *J* = 8.2 Hz, Ar-H).

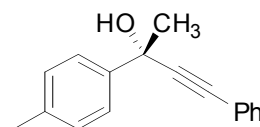

### 2-(4-Methoxyphenyl)-4-phenyl-but-3-yn-2-ol (4ha)<sup>11</sup>

$[\alpha]_D^{29} -7.1$  (*c* 0.60, CHCl<sub>3</sub>, 92% ee)

HPLC (Daicel chiralcel OD-H, hexane/IPA = 19/1, 1.0 mL/min):

*t<sub>R</sub>*(min) 11.2 (minor), 18.3 (major).

<sup>1</sup>H NMR (CDCl<sub>3</sub>, 400 MHz) :  $\delta$  1.86 (s, 3H, CH<sub>3</sub>), 2.42 (s, 1H, OH), 3.82 (s, 3H, OCH<sub>3</sub>), 6.90-6.93 (m, 2H, Ar-H), 7.32-7.35 (m, 3H, Ar-H), 7.47-7.49 (m, 2H, Ar-H), 7.64-7.67 (m, 2H, Ar-H).

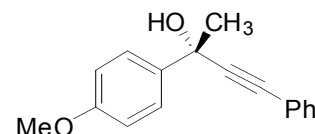

### 2-(3,4,5-Trimethoxyphenyl)-4-phenyl-but-3-yn-2-ol (4ia)

$[\alpha]_D^{16} +8.3$  (*c* 0.96, CHCl<sub>3</sub>, 92% ee)

HPLC (Daicel chiralcel OD-H, hexane/IPA = 6/1, 1.0 mL/min):

*t<sub>R</sub>*(min) 8.7 (minor), 10.8 (major).

<sup>1</sup>H NMR (CDCl<sub>3</sub>, 400 MHz) :  $\delta$  1.86 (s, 3H, CH<sub>3</sub>), 2.81 (s, 1H, OH), 3.85 (s, 3H, Ar-OCH<sub>3</sub>), 3.88 (s, 6H, Ar-OCH<sub>3</sub>), 6.97 (s, 2H, Ar-H), 7.32-7.34 (m, 3H, Ar-H), 7.45-7.47 (m, 2H, Ar-H).

<sup>13</sup>C NMR (CDCl<sub>3</sub>, 100 MHz) :  $\delta$  33.3, 56.0, 60.7, 70.3, 84.8, 92.3, 102.1, 122.4, 128.3, 128.5, 131.5, 137.1, 141.4, 152.8.

IR (neat) :  $\nu$  (cm<sup>-1</sup>) 3431, 2935, 2835, 1593, 1504, 1454, 1413, 1325, 1236, 1122.

LR-FABMS 335 ((M+Na)<sup>+</sup>, bp), 312, 129, 77. HR-FABMS calcd for C<sub>19</sub>H<sub>20</sub>O<sub>4</sub>Na ((M+Na)<sup>+</sup>) 335.1259, found 335.1269.

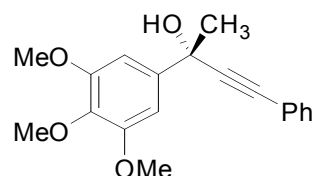

### 2-(4-Fluorophenyl)-4-phenyl-but-3-yn-2-ol (4ja)<sup>12</sup>

$[\alpha]_D^{27} -9.9$  (*c* 0.83, CHCl<sub>3</sub>, 91% ee)

HPLC (Daicel chiralcel OD-H, hexane/IPA = 19/1, 1.0 mL/min):

*t<sub>R</sub>*(min) 8.4 (minor), 10.5 (major).

<sup>1</sup>H NMR (CDCl<sub>3</sub>, 400 MHz) :  $\delta$  1.86 (s, 3H, CH<sub>3</sub>), 2.46 (s, 1H, OH), 7.04-7.08 (m, 2H, Ar-H), 7.31-7.35 (m, 3H, Ar-H), 7.47-7.49 (m, 2H, Ar-H), 7.68-7.71 (m, 2H, Ar-H).

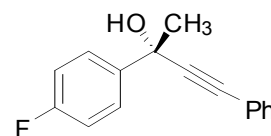

### 2-(2-Naphthyl)-4-phenyl-but-3-yn-2-ol (**4ka**)<sup>12</sup>

$[\alpha]_D^{24}$  -17.9 (*c* 0.27, CHCl<sub>3</sub>, 85% ee)

HPLC (Daicel chiralcel OD-H, hexane/IPA = 9/1, 1.0 mL/min):

*t<sub>R</sub>*(min) 8.3 (minor), 11.0 (major).

<sup>1</sup>H NMR (CDCl<sub>3</sub>, 400 MHz):  $\delta$  1.95 (s, 3H, CH<sub>3</sub>), 2.59 (s, 1H, OH), 7.34-7.35 (m, 3H, Ar-*H*), 7.48-7.52 (m, 4H, Ar-*H*), 7.80-7.88 (m, 4H, Ar-*H*), 8.19 (s, 1H, Ar-*H*).

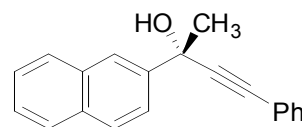

### 4-Phenyl-2-(pyridin-3-yl)-but-3-yn-2-ol (**4la**)<sup>6</sup>

$[\alpha]_D^{27}$  -1.4 (*c* 0.97, CHCl<sub>3</sub>, 87% ee)

HPLC (Daicel chiralcel OD-H, hexane/IPA = 9/1, 1.0 mL/min):

*t<sub>R</sub>*(min) 11.7 (minor), 14.8 (major).

<sup>1</sup>H NMR (CDCl<sub>3</sub>, 400 MHz):  $\delta$  1.89 (s, 3H, CH<sub>3</sub>), 7.27-7.35 (m, 4H), 7.46-7.51 (m, 2H, Ar-*H*), 8.01-8.03 (m, 1H, Ar-*H*), 8.54-8.56 (m, 1H, Ar-*H*), 8.99 (s, 1H, Ar-*H*).

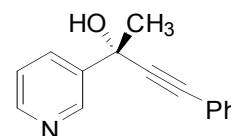

### Determination of absolute configurations of **4ca**, **4fa**, **4ga**.

(*S*)-(+)-Methyl 2-hydroxy-2-phenylbutanoate<sup>13, 14, 15</sup>

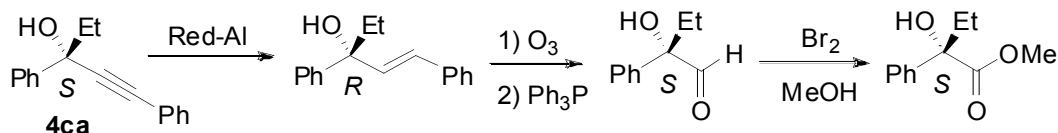

A solution of Red-Al in toluene (65%, 0.20 mL) was added to a solution of alcohol **4ca** (46 mg,  $[\alpha]_D^{23}$  -6.7 (*c* 1.0, CHCl<sub>3</sub>), 61% ee) in ether (10 mL) at 0 °C and the mixture was stirred at room temperature for 4 h. The reaction was quenched by dropwise addition of MeOH (2 mL) at 0 °C. The mixture was diluted with EtOAc and washed with a saturated solution of Rochelle's salt. The organic layer was dried over MgSO<sub>4</sub>, filtered, and concentrated under reduced pressure to yield a yellow oil, which was purified by column chromatography (hexane/AcOEt=9:1) to afford alkene (35.0 mg, 75% yield) as an oil.

Ozone was bubbled into a solution of the above alkene (35.0 mg, 0.147 mmol) in dichloromethane (10 mL) at -78 °C until a blue color persists. Oxygen was then passed through the solution and triphenylphosphine (50 mg, 0.19 mmol) was added to the mixture at the same temperature. The resulting mixture was stirred for 1 h at room temperature and concentrated under reduced pressure to yield a colorless oil, which was purified by column chromatography (hexane/AcOEt=9:1) to afford the aldehyde (24.0 mg, 99% yield) as a colorless oil.

Sodium bicarbonate (0.5 g, 6 mmol) was added to a solution of the above aldehyde in MeOH/water (9:1, 0.7 mL). To the mixture was added bromine (0.07 mL, 1.4 mmol) over 30 minutes with vigorous stirring at room temperature. After stirring for 4 h, excess bromine was decomposed with solid Na<sub>2</sub>S<sub>2</sub>O<sub>3</sub>. The mixture was filtered and filtrate was extracted with EtOAc. The organic layer was washed with brine, dried over

Na<sub>2</sub>SO<sub>4</sub>, filtered, and concentrated in vacuo. The obtained crude product was purified by column chromatography (hexane/AcOEt = 9:1) to give the ester (16 mg, 50% yield) as a colorless oil.

$[\alpha]_{\text{D}}^{24} = +22$  (c 0.50, CHCl<sub>3</sub>, 61% ee)

[lit.<sup>15</sup> :  $[\alpha]_{\text{D}}^{20} = +34$  (c 0.49, CHCl<sub>3</sub>, 81% ee), *S*.]

<sup>1</sup>H NMR (CDCl<sub>3</sub>, 400 MHz) :  $\delta$  0.92 (dd, 3H, *J* = 7.3, 7.3 Hz, CH<sub>2</sub>CH<sub>3</sub>), (dq, 1H, *J* = 7.3, 14.2 Hz, CH<sub>2</sub>CH<sub>3</sub>), (dq, 1H, *J* = 7.3, 14.2 Hz, CH<sub>2</sub>CH<sub>3</sub>), 3.75 (s, 1H, OH), 3.78 (s, 3H, OCH<sub>3</sub>), 7.25-7.37 (m, 3H, Ar-*H*), 7.57 (m, 2H, Ar-*H*).

### **(*S*)-(+)-Methyl 2-hydroxy-2-(4-methylphenyl)-propionate<sup>16</sup>**

According to the above procedure, 4-phenyl-2-p-tolyl-but-3-yn-2-ol ( $[\alpha]_{\text{D}}^{18} -5.4$  (c 0.56, CHCl<sub>3</sub>), 81% ee) was converted into the corresponding methyl ester.

$[\alpha]_{\text{D}}^{28} = +25$  (c 0.16, CHCl<sub>3</sub>, 81% ee) [lit. :  $[\alpha]_{\text{D}}^{25} = +54$  (c 1.6, CHCl<sub>3</sub>, 85% ee), *S*.]

<sup>1</sup>H NMR (CDCl<sub>3</sub>, 400 MHz) :  $\delta$  1.77 (s, 3H, CH<sub>3</sub>), 2.34 (s, 3H, Ar-CH<sub>3</sub>), 3.68 (s, 1H, OH), 3.77 (s, 3H, OCH<sub>3</sub>), 7.16 (d, 2H, *J* = 7.8 Hz, Ar-*H*), 7.42 (d, 2H, *J* = 8.2 Hz, Ar-*H*).

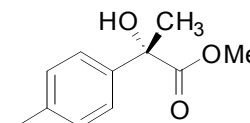

### **(*S*)-(+)-Methyl 2-hydroxy-2-methyl-4-phenylbutanoate<sup>16</sup>**

According to the above procedure, 3-methyl-1,5-diphenyl-pent-1-yn-3-ol ( $[\alpha]_{\text{D}}^{24} +6.3$  (c 1.48, CHCl<sub>3</sub>), 39% ee) was converted into the corresponding methyl ester.

$[\alpha]_{\text{D}}^{25} = +18$  (c 1.50, CHCl<sub>3</sub>, 39% ee) [lit. :  $[\alpha]_{\text{D}}^{25} = +7.2$  (c 1.5, CHCl<sub>3</sub>, 19% ee), *S*.]

<sup>1</sup>H NMR (CDCl<sub>3</sub>, 400 MHz) :  $\delta$  1.45 (s, 3H, CH<sub>3</sub>), 1.94-2.12 (m, 2H), 2.43-2.50 (m, 1H), 2.76-2.83 (m, 1H), 3.28 (s, 1H, OH), 3.73 (s, 3H, OCH<sub>3</sub>), 7.16-7.19 (m, 3H, Ar-*H*), 7.25-7.29 (m, 2H, Ar-*H*).

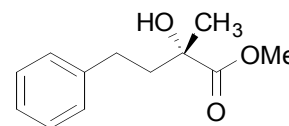

1. T. R. Wu, L. Shen and J. M. Chong, *Org. Lett.*, 2004, **6**, 2701-2704.
2. T. Ueda, K. Tanaka, T. Ichibakase, Y. Orito and M. Nakajima, *Tetrahedron*, 2010, **51**, 2168-2169.
3. R. B. II. Lettan and A. Scheidt, *Org. Lett.*, 2005, **7**, 3227-3230.
4. T. Ishikawa, T. Mizuta, K. Hagiwara, T. Aikawa, T. Kudo and S. Saito, *J. Org. Chem.*, 2003, **68**, 3702-3705.
5. J. Chatt, R. G. Guy, L. A. Duncanson and D. T. Thompson, *J. Chem. Soc.*, 1963, 5170-5183.
6. G. Lu, X. Li, Y.-M. Li, F. Y. Kwong and A. S. C. Chan, *Adv. Synth. Catal.*, 2006, **348**, 1926-1933.
7. X. Zhang, W. T. Teo and P. W. H. Chan, *Org. Lett.*, 2009, **11**, 4990-4993.
8. P. G. Cozzi and S. Alesi, *Chem. Commun.*, 2004, 2448-2449.
9. P. G. Cozzi, *Angew. Chem. Int. Ed.*, 2003, **42**, 2895-2898.
10. L. Liu, R. Wang, Y.-F. Kang, Chen, Z.-Q. Xu, Y.-F. Zhou, M. Ni, H.-Q. Cai and M.-Z. Gong, *J. Org. Chem.*, 2005, **70**, 1084-1086.
11. K. Pathak, A. P. Bhatt, S. H. R. Abdi, R. I. Kureshy, N.-U. H. Khan, I. Ahmad and R. V. Jasra,

*Chirality*, 2007, **19**, 82-88.

12. C. Chan, L. Hong, Z.-Q. Xu, L. Liu and R. Wang, *Org. Lett.*, 2006, **8**, 2277-2280.
13. D. K. Friel, M. L. Snapper and A. H. Hoveyda, *J. Am. Chem. Soc.*, 2008, **130**, 9942-9951.
14. E. B. Choi, I. K. Youn and C. S. Pak, *Synthesis*, 1988, 792-794.
15. L. C. Wieland, H. Deng, M. L. Snapper and A. H. Hoveyda, *J. Am. Chem. Soc.*, 2005, **127**, 15453-15456.
16. H.-L. Wu, P.-Y. Wu, Y.-Y. Shen and B.-J. Uang, *J. Org. Chem.*, 2008, **73**, 6445-6447.

CH. 1 C.S 1.25 ATT 8 OFFS 0 00/00/00 01:14

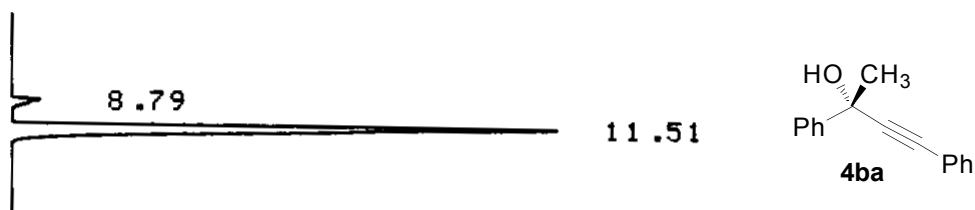

D-2500

METHOD: TAG: 2 CH: 1

FILE: 0 CALC-METHOD: AREA% TABLE: 0 CONC: AREA

| NO.   | RT    | AREA    | CONC    | BC |
|-------|-------|---------|---------|----|
| 1     | 8.79  | 178845  | 3.702   | BB |
| 2     | 11.51 | 4652662 | 96.298  | BB |
| TOTAL |       | 4831507 | 100.000 |    |

C-RSA CHROMATOPAC CH=1 Report No.=4

DATA=1:@CHRM1.C00

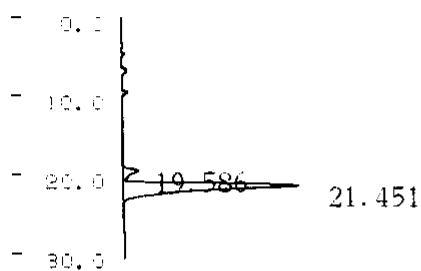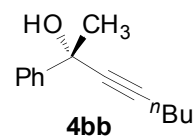

\*\* CALCULATION REPORT \*\*

| CH    | PKNO | TIME   | AREA   | HEIGHT | MK | IDNO | CONC   | NAME |
|-------|------|--------|--------|--------|----|------|--------|------|
| 1     | 8    | 19.586 | 41480  | 863    |    |      | 6.363  |      |
|       | 9    | 21.451 | 610408 | 10128  | V  |      | 93.637 |      |
| TOTAL |      |        | 651888 | 10991  |    |      | 100    |      |

C-R8A CHROMATOPAC CH=1 Report No.=11

DATA=1:@CHRM1.C00

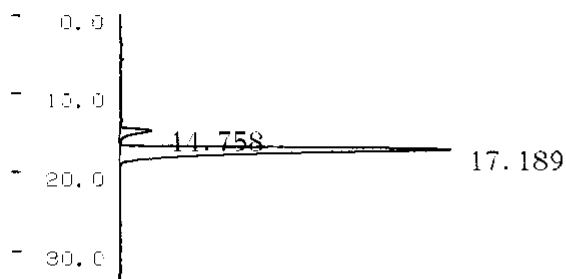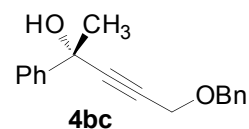

**\*\* CALCULATION REPORT \*\***

| CH    | PKNO | TIME   | AREA    | HEIGHT | MK | IDNO | CONC    | NAME |
|-------|------|--------|---------|--------|----|------|---------|------|
| 1     | 10   | 14.758 | 155234  | 3663   |    |      | 7.0346  |      |
|       | 11   | 17.189 | 2051491 | 38573  |    |      | 92.9654 |      |
| TOTAL |      |        | 2206725 | 42236  |    |      | 100     |      |

C-R8A CHROMATOPAC CH=1 Report No.=2

DATA=1:@CHRM1.C00

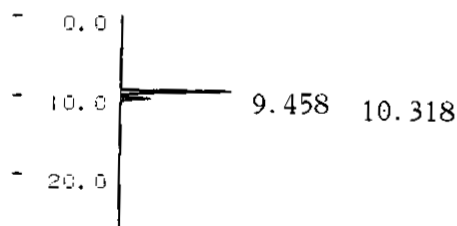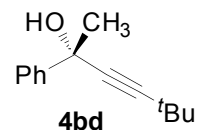

**\*\* CALCULATION REPORT \*\***

| CH    | PKNO | TIME   | AREA   | HEIGHT | MK | IDNO | CONC    | NAME |
|-------|------|--------|--------|--------|----|------|---------|------|
| 1     | 3    | 9.458  | 381464 | 25767  |    |      | 77.5667 |      |
|       | 4    | 10.318 | 110324 | 6899   | V  |      | 22.4333 |      |
| TOTAL |      |        | 491788 | 32667  |    |      | 100     |      |



CH. 1 C.S 1.25 ATT 9 OFFS 0

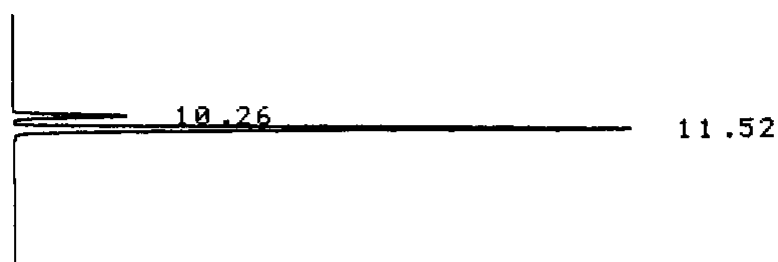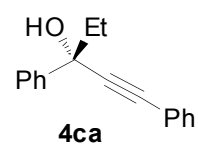

D-2500

METHOD: TAG: 1 CH: 1

FILE: 0 CALC-METHOD: AREA% TABLE: 0 CONC: AREA

| NO.   | RT    | AREA    | CONC    | BC |
|-------|-------|---------|---------|----|
| 1     | 10.26 | 900325  | 13.644  | BU |
| 2     | 11.52 | 5698409 | 86.356  | UB |
| TOTAL |       | 6598734 | 100.000 |    |

CH. 1 C.S 1.25 ATT 9 OFFS 0

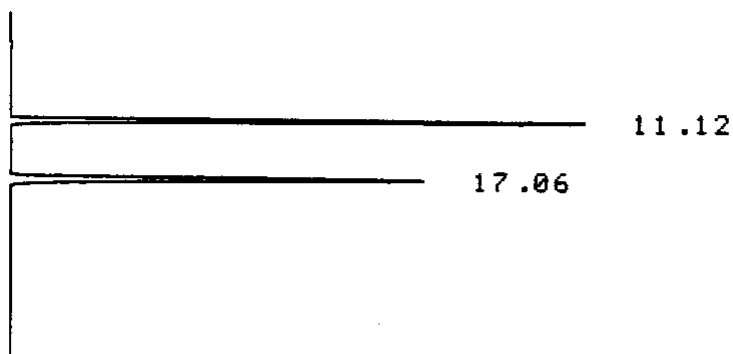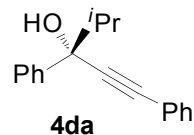

D-2500

METHOD: TAG: 2 CH: 1

FILE: 0 CALC-METHOD: AREA% TABLE: 0 CONC: AREA

| NO.   | RT    | AREA    | CONC    | BC |
|-------|-------|---------|---------|----|
| 1     | 11.12 | 3476607 | 46.627  | BB |
| 2     | 17.06 | 3979612 | 53.373  | BB |
| TOTAL |       | 7456219 | 100.000 |    |

C-RSA CHROMATOPAC CH=1 Report No.=3 DATA=1:@CHRM1.C00

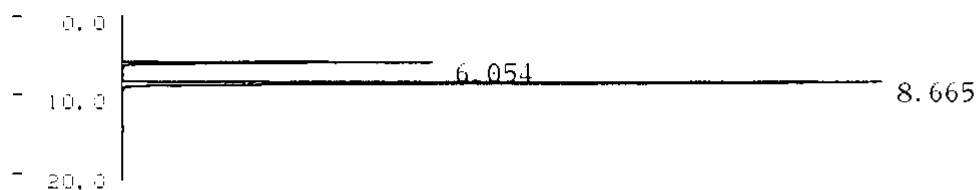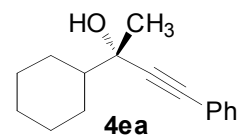

**\*\* CALCULATION REPORT \*\***

| CH    | PKNO | TIME  | AREA    | HEIGHT | MK | IDNO | CONC    | NAME |
|-------|------|-------|---------|--------|----|------|---------|------|
| 1     | 6    | 6.054 | 738085  | 72287  |    |      | 21.3246 |      |
|       | 8    | 8.665 | 2723112 | 176412 |    |      | 78.6754 |      |
| TOTAL |      |       | 3461197 | 248700 |    |      | 100     |      |

C-R8A CHROMATOPAC CH=1 Report No.=7 DATA=1:@CHRM1.C00

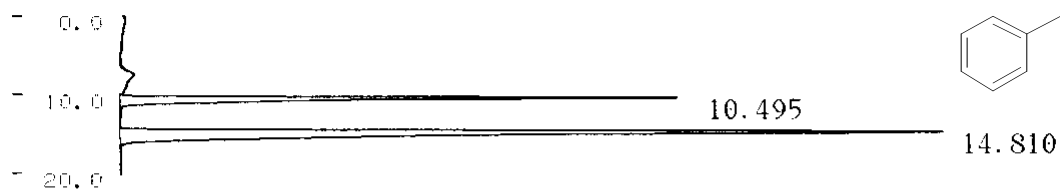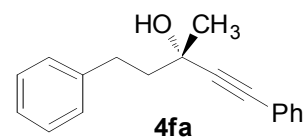

**\*\* CALCULATION REPORT \*\***

| CH    | PKNO | TIME   | AREA     | HEIGHT  | MK | IDNO | CONC   | NAME |
|-------|------|--------|----------|---------|----|------|--------|------|
| 1     | 10   | 10.495 | 14153062 | 515722  | SV |      | 30.439 |      |
|       | 12   | 14.81  | 32343446 | 760972  |    |      | 69.561 |      |
| TOTAL |      |        | 46496508 | 1276694 |    |      | 100    |      |

C-R8A CHROMATOPAC CH=1 Report No.=6 DATA=1:@CHRM1.C00

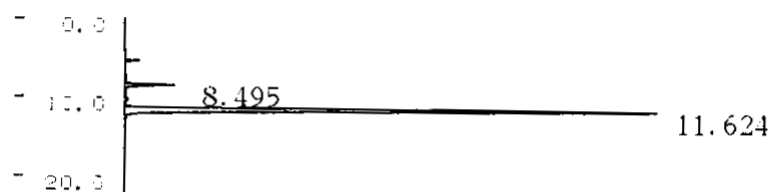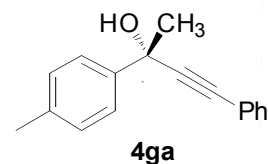

**\*\* CALCULATION REPORT \*\***

| CH    | PKNO | TIME   | AREA    | HEIGHT | MK | IDNO | CONC    | NAME |
|-------|------|--------|---------|--------|----|------|---------|------|
| 1     | 8    | 8.495  | 91706   | 5821   |    |      | 6.1642  |      |
|       | 10   | 11.624 | 1396015 | 61841  |    |      | 93.8358 |      |
| TOTAL |      |        | 1487721 | 67662  |    |      | 100     |      |

CH. 1 C.S 1.25 ATT 8 OFFS 0

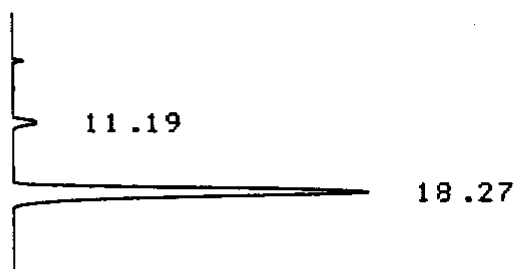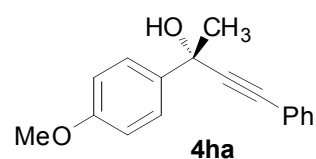

D-2500

METHOD: TAG: 1 CH: 1

FILE: 0 CALC-METHOD: AREA% TABLE: 0 CONC: AREA

| NO.   | RT    | AREA    | CONC    | BC |
|-------|-------|---------|---------|----|
| 1     | 11.19 | 181145  | 4.062   | BB |
| 2     | 18.27 | 4278812 | 95.938  | BB |
| TOTAL |       | 4459957 | 100.000 |    |

CH. 1 C.S 1.25 ATT 10 OFFS 0

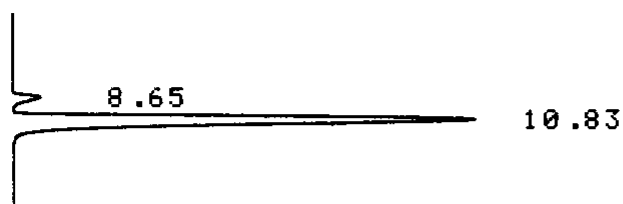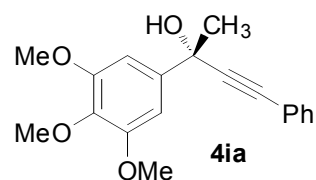

D-2500

METHOD: TAG: 3 CH: 1

FILE: 0 CALC-METHOD: AREA% TABLE: 0 CONC: AREA

| NO.   | RT    | AREA     | CONC    | BC |
|-------|-------|----------|---------|----|
| 1     | 8.65  | 887096   | 4.012   | BU |
| 2     | 10.83 | 21225511 | 95.988  | UB |
| TOTAL |       | 22112607 | 100.000 |    |

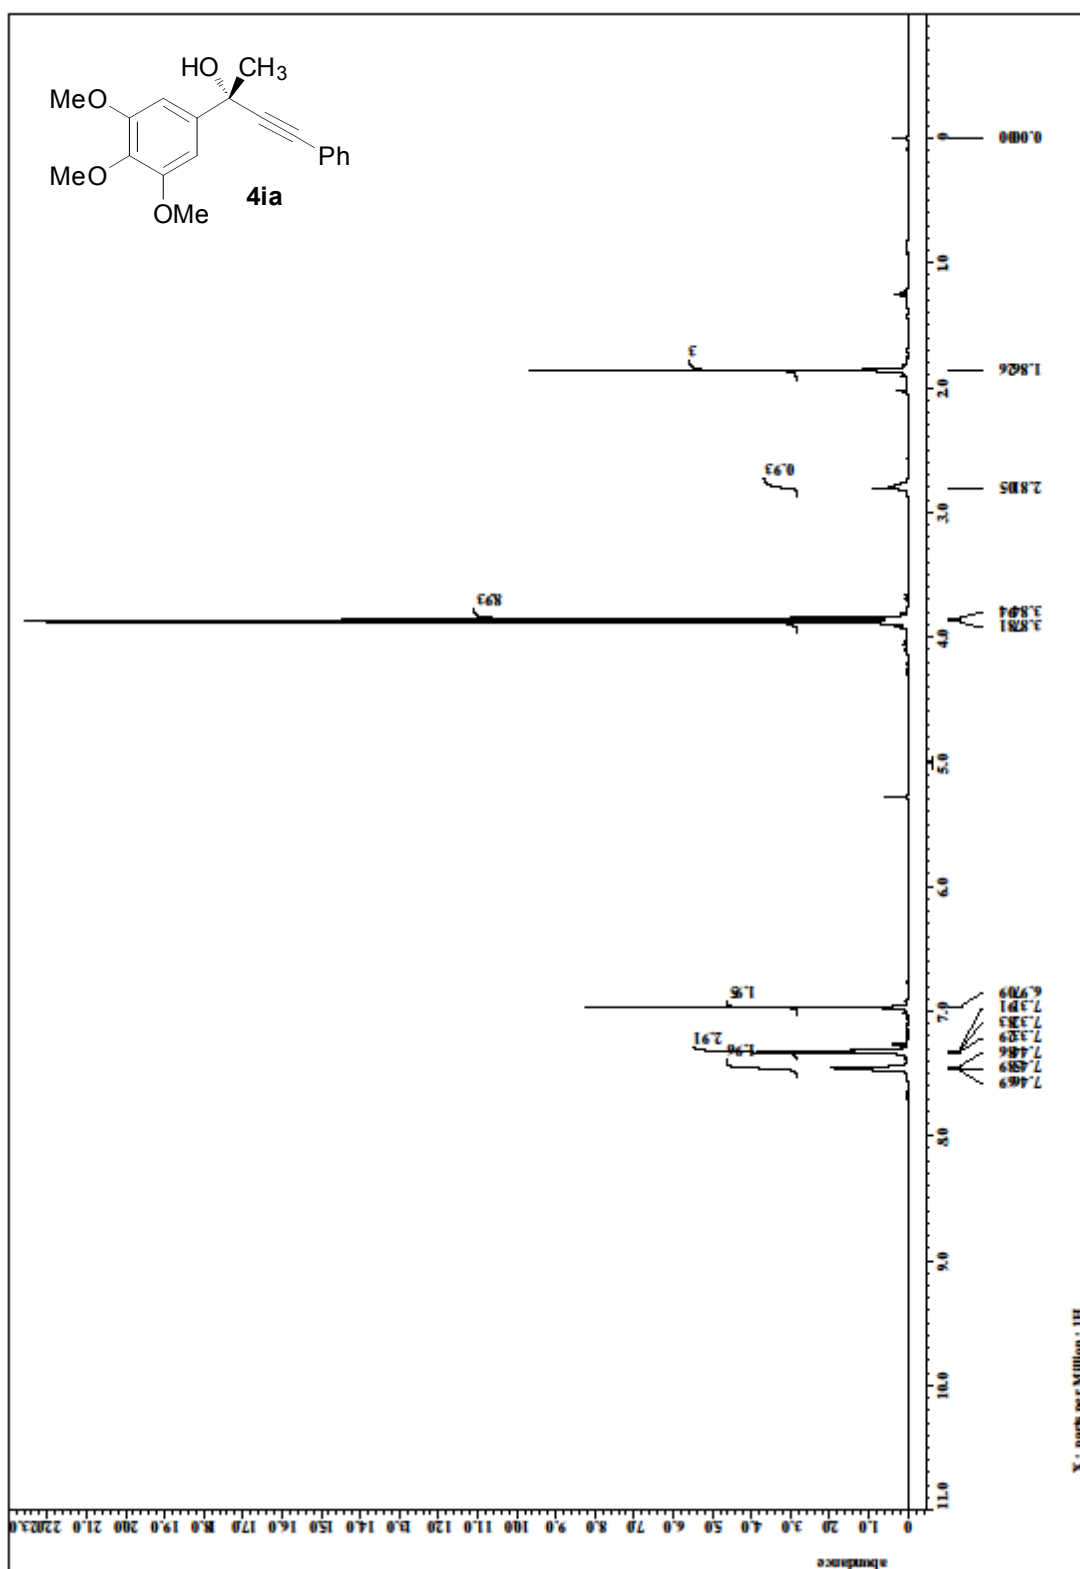

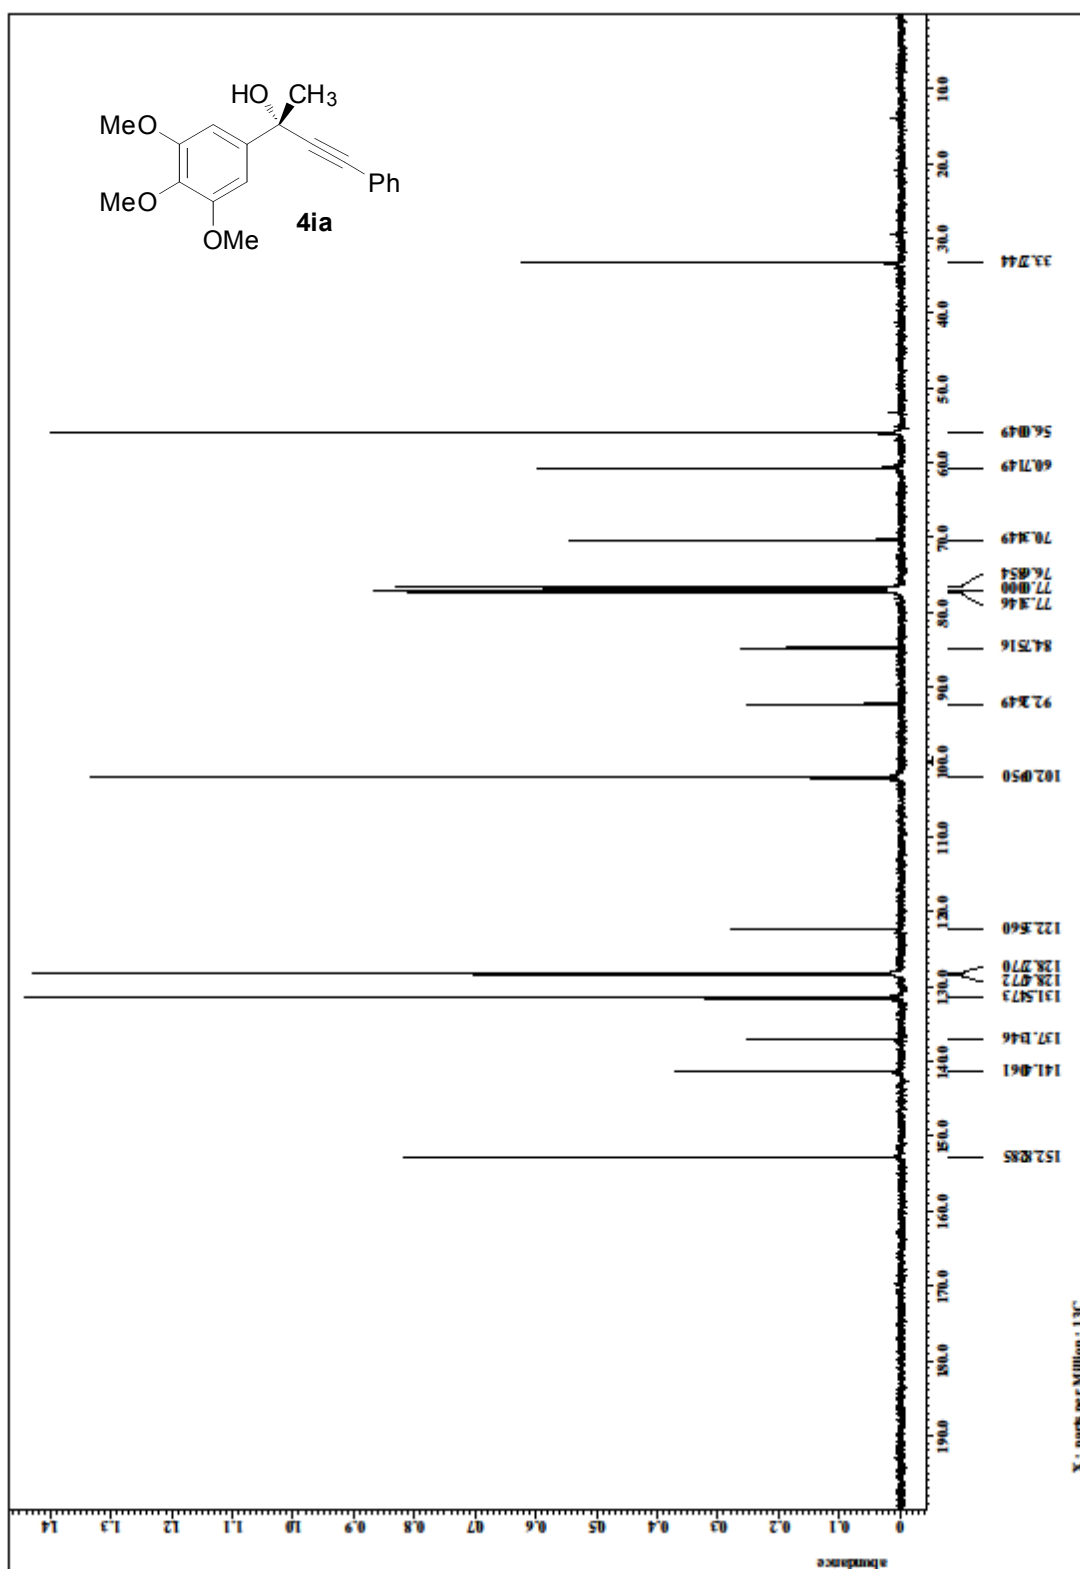

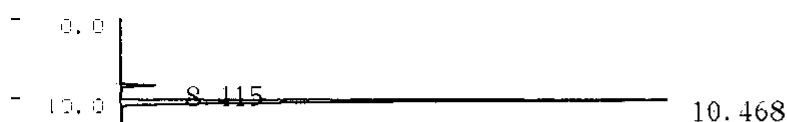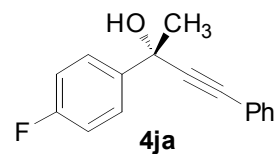

**\*\* CALCULATION REPORT \*\***

| CH    | PKNO | TIME   | AREA    | HEIGHT | MK | IDNO | CONC   | NAME |
|-------|------|--------|---------|--------|----|------|--------|------|
| 1     | 1    | 8.415  | 118081  | 8031   |    |      | 4.651  |      |
|       | 2    | 10.468 | 2420739 | 126901 |    |      | 95.349 |      |
| TOTAL |      |        | 2538820 | 134933 |    |      | 100    |      |

C-RSA CHROMATOPAC CH=1 Report No.=3 DATA=1:@CHRM1.C00

C-RSA CHROMATOPAC CH=1 Report No.=2 DATA=1:@CHRM1.C00

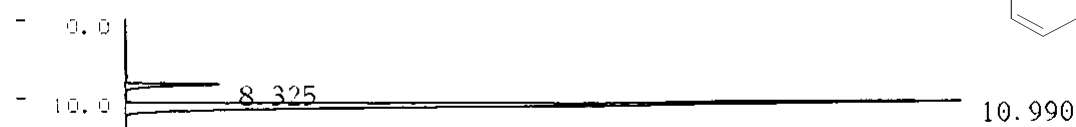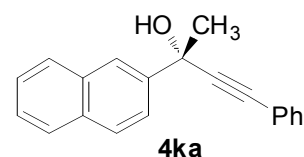

**\*\* CALCULATION REPORT \*\***

| CH    | PKNO | TIME  | AREA    | HEIGHT | MK | IDNO | CONC    | NAME |
|-------|------|-------|---------|--------|----|------|---------|------|
| 1     | 7    | 8.325 | 241235  | 10911  |    |      | 7.5882  |      |
|       | 8    | 10.99 | 2937861 | 97128  |    |      | 92.4118 |      |
| TOTAL |      |       | 3179095 | 108040 |    |      | 100     |      |

C-RSA CHROMATOPAC CH=1 Report No.=2 DATA=1:@CHRM1.C00

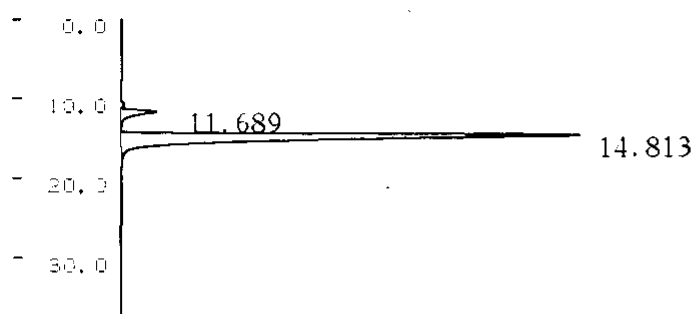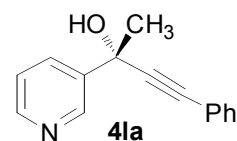

**\*\* CALCULATION REPORT \*\***

| CH    | PKNO | TIME   | AREA    | HEIGHT | MK | IDNO | CONC    | NAME |
|-------|------|--------|---------|--------|----|------|---------|------|
| 1     | 5    | 11.689 | 358967  | 8371   | V  |      | 6.3958  |      |
|       | 6    | 14.813 | 5253583 | 106831 | S  |      | 93.6042 |      |
| TOTAL |      |        | 5612550 | 115202 |    |      | 100     |      |
